# Supplementary material for: Solvothermal synthesis and efficient visible light-driven photocatalytic property of 2-D iodoargentate hybrid directed by solvated Fe(III) cation
Source: Research Square preprint supplement (doi:10.21203/rs.3.rs-8885980/v1), 2026-02-20
Supplement: Supplementary file 1 [file 83a1ee4079df927c569f0e70.docx]

**Supplementary Information**

Solvothermal synthesis and efficient visible light-driven photocatalytic property of 2-D iodoargentate hybrid directed by solvated Fe(III) cation

Hongjin Zhu, and Dingxian Jia*

College of Chemistry, Chemical Engineering and Materials Science, Soochow University, Suzhou 215123, People’s Republic of China.

**Table S1.** Crystallographic data of **1**

| CCDC | 2528821 |
| --- | --- |
| Empirical formula | C12H36Ag10FeI13O6S6 |
| Formula weight | 3253.02 |
| Crystal system | Monoclinic |
| Space group | *P*21/*c* |
| *a* (Å) | 11.9829(7) |
| *b* (Å) | 19.7853(12) |
| *c* (Å) | 24.8204(15) |
| α (°) | 90 |
| *β* (°) | 91.480(2) |
| γ (°) | 90 |
| *V* (Å3) | 5882.6(6) |
| *Z* | 4 |
| *T* (K) | 296(2) |
| 2*θ* (max) (deg) | 50.70 |
| Total reflections | 160166 |
| Unique reflections | 10767 |
| *R*int | 0.1261 |
| Reflections with [I > 2σ(I)] | 8495 |
| No. of parameters | 448 |
| *R*1 [I > 2σ(I)] | 0.0359 |
| *wR*2 [I > 2σ(I)] | 0.0752 |
| GOF on *F*2 | 1.032 |

**Table S2.** Selected Bond Lengths (Å) and Angles (deg) for **1**

| Ag(1)–I(3) | 2.7895(9) | Ag(1)–I(1) | 2.8634(9) |
| --- | --- | --- | --- |
| Ag(1)–I(2) | 2.8301(9) | Ag(1)–I(4) | 2.9613(9) |
| Ag(2A)–I(1) | 3.1727(15) | Ag(2A)–I(11)#4 | 2.8207(12) |
| Ag(2A)–I(13)#6 | 2.7919(12) | Ag(2A)–I(2) | 2.8022(12) |
| Ag(2B)–I(2) | 2.884(8) | Ag(2B)–I(10)#4 | 3.234(11) |
| Ag(2B)–I(11)#4 | 2.838(8) | Ag(2B)–I(13)#6 | 2.755(8) |
| Ag(3)–I(5) | 2.7867(10) | Ag(3)–I(4) | 2.8834(9) |
| Ag(3)–I(1) | 2.8122(9) | Ag(3)–I(11)#4 | 2.8884(10) |
| Ag(4)–I(8) | 2.7637(9) | Ag(4)–I(6) | 2.8787(9) |
| Ag(4)–I(3) | 2.7720(9) | Ag(4)–I(4) | 2.9360(9) |
| Ag(5)–I(6) | 2.8350(9) | Ag(5)–I(7)#3 | 2.8669(9) |
| Ag(5)–I(1) | 2.8470(10) | Ag(6)–I(5) | 2.8405(9) |
| Ag(5)–I(7) | 2.8611(10) | Ag(6)–I(6) | 2.9649(9) |
| Ag(6)–I(9) | 2.7811(9) | Ag(7)–I(4) | 2.8990(10) |
| Ag(6)–I(7) | 2.8163(9) | Ag(7)–I(5) | 2.9344(10) |
| Ag(7)–I(10) | 2.8424(9) | Ag(8)–I(8) | 2.7511(10) |
| Ag(7)–I(6) | 2.8630(9) | Ag(8)–I(12) | 2.8095(10) |
| Ag(8)–I(11) | 2.9974(10) | Ag(9A)–I(9) | 2.7532(17) |
| Ag(8)–I(10) | 2.8623(9) | Ag(9A)–I(10) | 2.8973(13) |
| Ag(9A)–I(11) | 2.9738(19) | Ag(9A)–I(2)#1 | 2.9369(18) |
| Ag(9B)–I(11) | 2.889(13) | Ag(9B)–I(2)#1 | 2.871(13) |
| Ag(10)–I(13) | 2.8502(11) | Ag(10)–I(12) | 2.7426(11) |
| Ag(2A)–Ag(9A)#4 | 3.062(2) | Ag(10)–I(13)#5 | 2.8490(11) |
| Ag(2B)–Ag(10)#4 | 2.965(8) | Ag(2B)–Ag(9B)#4 | 2.912(15) |
| Ag(5)–Ag(5)#3 | 2.9841(14) | Ag(9A)–Ag(2A)#1 | 3.062(2) |
| Ag(10)–Ag(2B)#1 | 2.965(8) | Ag(10)–Ag(10)#5 | 3.295(2) |
| Fe(1)–O(1) | 1.988(5) | Fe(1)–O(2) | 2.032(6) |
| Fe(1)–O(3) | 1.995(6) | Fe(1)–O(4) | 1.981(6) |
| Fe(1)–O(5) | 1.992(6) | Fe(1)–O(6) | 1.983(5) |
|  |  |  |  |
| I(3)–Ag(1)–I(2) | 114.04(3) | I(3)–Ag(1)–I(4) | 111.81(3) |
| I(3)–Ag(1)–I(1) | 114.78(3) | I(2)–Ag(1)–I(4) | 98.70(3) |
| I(2)–Ag(1)–I(1) | 112.84(3) | I(1)–Ag(1)–I(4) | 102.90(3) |
| I(13)#6–Ag(2A)–I(2) | 112.33(4) | I(2)–Ag(2A)–I(11)#4 | 118.08(4) |
| Ag(2B)–Ag(2A)–I(11)#4 | 80.6(4) | I(13)#6–Ag(2A)–I(1) | 90.61(3) |
| I(13)#6–Ag(2A)–I(11)#4 | 121.86(4) | I(2)–Ag(2A)–I(1) | 104.93(4) |
| I(11)#4–Ag(2A)–I(1) | 102.27(4) | I(13)#6–Ag(2B)–I(11)#4 | 122.6(3) |
| I(11)#4–Ag(2B)–I(2) | 114.8(2) | I(2)–Ag(2B)–I(10)#4 | 96.1(3) |
| I(13)#6–Ag(2B)–I(10)#4 | 120.3(3) | I(13)#6–Ag(2B)–I(2) | 111.0(3) |
| I(11)#4–Ag(2B)–I(10)#4 | 87.4(2) | I(5)–Ag(3)–I(11)#4 | 110.55(3) |
| I(5)–Ag(3)–I(1) | 115.64(3) | I(1)–Ag(3)–I(11)#4 | 110.07(3) |
| I(5)–Ag(3)–I(4) | 111.91(3) | I(4)–Ag(3)–I(11)#4 | 101.44(3) |
| I(1)–Ag(3)–I(4) | 106.23(3) | I(8)–Ag(4)–I(4) | 102.00(3) |
| I(8)–Ag(4)–I(3) | 123.80(3) | I(3)–Ag(4)–I(4) | 113.10(3) |
| I(8)–Ag(4)–I(6) | 95.99(3) | I(6)–Ag(4)–I(4) | 101.79(3) |
| I(3)–Ag(4)–I(6) | 116.71(3) | I(6)–Ag(5)–I(1) | 114.12(3) |
| I(6)–Ag(5)–I(7) | 108.41(3) | I(7)–Ag(5)–I(7)#3 | 117.21(3) |
| I(1)–Ag(5)–I(7) | 110.00(3) | I(1)–Ag(5)–I(7)#3 | 101.52(3) |
| I(6)–Ag(5)–I(7)#3 | 105.63(3) | I(9)–Ag(6)–I(7) | 115.53(3) |
| I(9)–Ag(6)–I(5) | 113.63(3) | I(9)–Ag(6)–I(6) | 98.66(3) |
| I(7)–Ag(6)–I(5) | 109.58(3) | I(7)–Ag(6)–I(6) | 106.07(3) |
| I(10)–Ag(7)–I(6) | 120.24(3) | I(5)–Ag(6)–I(6) | 112.75(3) |
| I(10)–Ag(7)–I(4) | 104.38(3) | I(10)–Ag(7)–I(5) | 107.67(3) |
| I(6)–Ag(7)–I(4) | 103.09(3) | I(6)–Ag(7)–I(5) | 113.01(3) |
| I(8)–Ag(8)–I(12) | 103.22(3) | I(4)–Ag(7)–I(5) | 107.31(3) |
| I(8)–Ag(8)–I(10) | 121.55(3) | I(8)–Ag(8)–I(11) | 112.02(3) |
| I(12)–Ag(8)–I(10) | 116.21(3) | I(12)–Ag(8)–I(11) | 112.12(3) |
| I(9)–Ag(9A)–I(2)#1 | 105.97(5) | I(10)–Ag(8)–I(11) | 91.70(3) |
| I(10)–Ag(9A)–I(11) | 91.49(5) | I(9)–Ag(9A)–I(10) | 123.86(6) |
| I(9)–Ag(9A)–I(11) | 121.62(6) | I(2)#1–Ag(9A)–I(11) | 109.33(6) |
| I(9)–Ag(9B)–I(11) | 132.8(5) | I(10)–Ag(9A)–I(2)#1 | 102.63(5) |
| I(2)#1–Ag(9B)–I(11) | 113.7(4) | I(9)–Ag(9B)–I(2)#1 | 113.3(5) |
| I(12)–Ag(10)–I(13) | 121.30(4) | I(13)#5–Ag(10)–I(13) | 109.34(3) |
| I(12)–Ag(10)–I(13)#5 | 112.37(4) | Ag(3)–I(1)–Ag(2A) | 67.09(3) |
| Ag(3)–I(1)–Ag(5) | 96.60(3) | Ag(5)–I(1)–Ag(2A) | 159.94(3) |
| Ag(3)–I(1)–Ag(1) | 74.62(3) | Ag(1)–I(1)–Ag(2A) | 65.48(3) |
| Ag(5)–I(1)–Ag(1) | 99.83(3) | Ag(2A)–I(2)–Ag(1) | 71.10(4) |
| Ag(1)–I(2)–Ag(2B) | 91.5(2) | Ag(1)–I(2)–Ag(9B)#4 | 88.0(4) |
| Ag(1)–I(2)–Ag(9A) | 101.51(3) | Ag(4)–I(3)–Ag(1) | 65.79(2) |
| Ag(3)–I(4)–Ag(7) | 65.75(3) | Ag(3)–I(4)–Ag(4) | 104.03(3) |
| Ag(7)–I(4)–Ag(4) | 74.75(2) | Ag(3)–I(4)–Ag(1) | 72.11(2) |
| Ag(7)–I(4)–Ag(1) | 107.32(3) | Ag(4)–I(4)–Ag(1) | 61.62(2) |
| Ag(3)–I(5)–Ag(6) | 98.39(3) | Ag(3)–I(5)–Ag(7) | 66.48(3) |
| Ag(6)–I(5)–Ag(7) | 63.45(2) | Ag(5)–I(6)–Ag(7) | 99.41(3) |
| Ag(5)–I(6)–Ag(4) | 98.63(3) | Ag(7)–I(6)–Ag(4) | 76.18(3) |
| Ag(5)–I(6)–Ag(6) | 65.80(2) | Ag(7)–I(6)–Ag(6) | 62.80(2) |
| Ag(4)–I(6)–Ag(6) | 131.39(3) | Ag(6)–I(7)–Ag(5) | 67.45(2) |
| Ag(6)–I(7)–Ag(5)#3 | 121.01(3) | Ag(5)–I(7)–Ag(5)#3 | 62.79(3) |
| Ag(8)–I(8)–Ag(4) | 114.23(3) | Ag(9A)–I(9)–Ag(6) | 102.71(4) |
| Ag(9B)–I(9)–Ag(6) | 116.9(4) | Ag(7)–I(10)–Ag(9A) | 87.97(4) |
| Ag(7)–I(10)–Ag(8) | 93.64(3) | Ag(7)–I(10)–Ag(2B)#1 | 136.92(12) |
| Ag(8)–I(10)–Ag(9A) | 89.11(4) | Ag(2A)#1–I(11)–Ag(3)#1 | 71.13(4) |
| Ag(8)–I(10)–Ag(2B)#1 | 73.30(15) | Ag(3)#1–I(11)–Ag(9B) | 85.2(4) |
| Ag(2B)#1–I(11)–Ag(3)#1 | 91.6(2) | Ag(2A)–I(11)–Ag(9A) | 63.73(4) |
| Ag(2B)#1–I(11)–Ag(9B) | 61.1(3) | Ag(3)#1–I(11)–Ag(9A) | 98.64(3) |
| Ag(2A)#1–I(11)–Ag(8) | 96.81(4) | Ag(2B)#1–I(11)–Ag(8) | 77.40(19) |
| Ag(3)#1–I(11)–Ag(8) | 163.61(3) | Ag(9B)–I(11)–Ag(8) | 99.7(4) |
| Ag(9A)–I(11)–Ag(8) | 85.18(3) | Ag(10)–I(12)–Ag(8) | 69.58(3) |
| Ag(2B)#2–I(13)–Ag(10)#5 | 63.87(19) | Ag(2A)#2–I(13)–Ag(10) | 121.17(4) |
| Ag(2A)#2–I(13)–Ag(10)#5 | 83.75(4) | Ag(10)#5–I(13)–Ag(10) | 70.65(3) |
| O(4)–Fe(1)–O(6) | 90.4(2) | O(6)–Fe(1)–O(3) | 93.4(2) |
| O(4)–Fe(1)–O(1) | 89.2(2) | O(1)–Fe(1)–O(3) | 90.0(2) |
| O(6)–Fe(1)–O(1) | 176.5(2) | O(5)–Fe(1)–O(3) | 88.0(3) |
| O(4)–Fe(1)–O(5) | 179.0(2) | O(4)–Fe(1)–O(2) | 90.4(2) |
| O(6)–Fe(1)–O(5) | 88.7(2) | O(6)–Fe(1)–O(2) | 88.8(2) |
| O(1)–Fe(1)–O(5) | 91.7(2) | O(1)–Fe(1)–O(2) | 87.7(2) |
| O(4)–Fe(1)–O(3) | 91.6(3) | O(5)–Fe(1)–O(2) | 90.0(2) |
| O(3)–Fe(1)–O(2) | 176.9(3) |  |  |

Symmetry transformations used to generate equivalent atoms: #5 x, –y+1, z–1/2; #7 –x, y+1/2, –z+1/2; #8 –x, y–1/2, –z+1/2; #9 –x, –y, –z+1; #10 –x, –y, –z; #11 –x, –y+1/2, z+1/2.


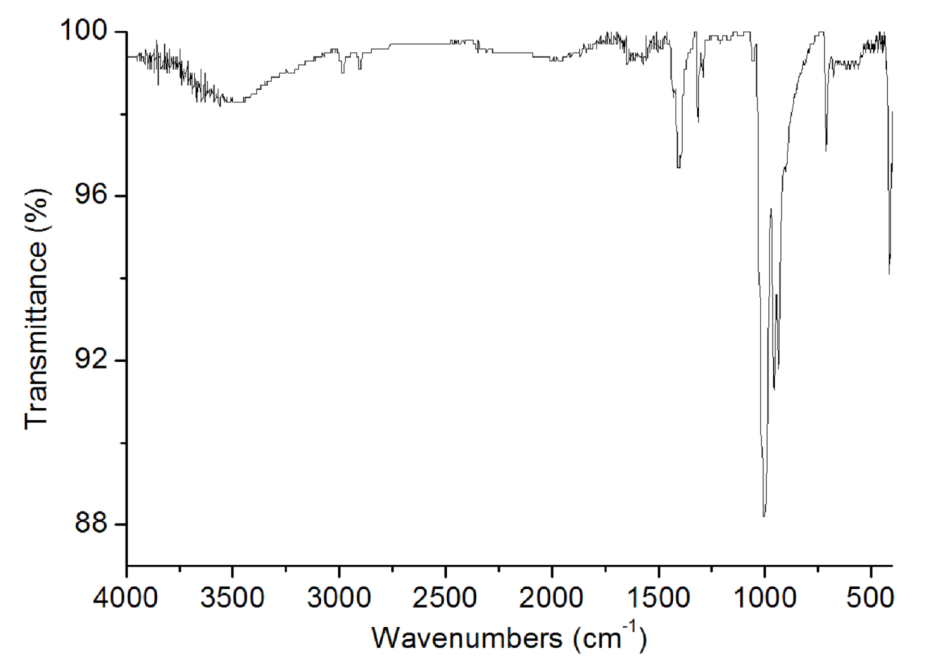


**Fig. S1.** IR spectrum of **1**.


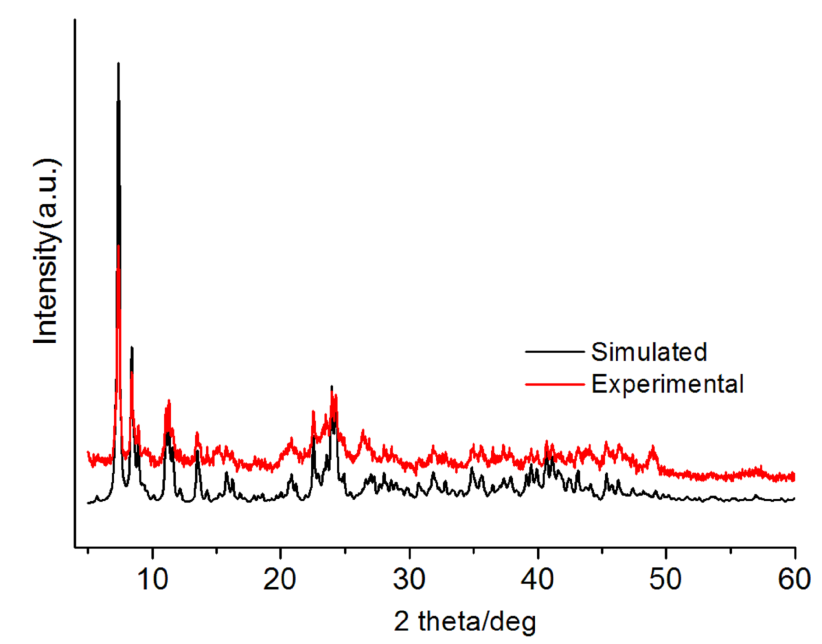


**Fig. S2.** Simulated powder XRD patterns based on single crystal data of compound **1**, and experimental powder XRD patterns of compound **1**.


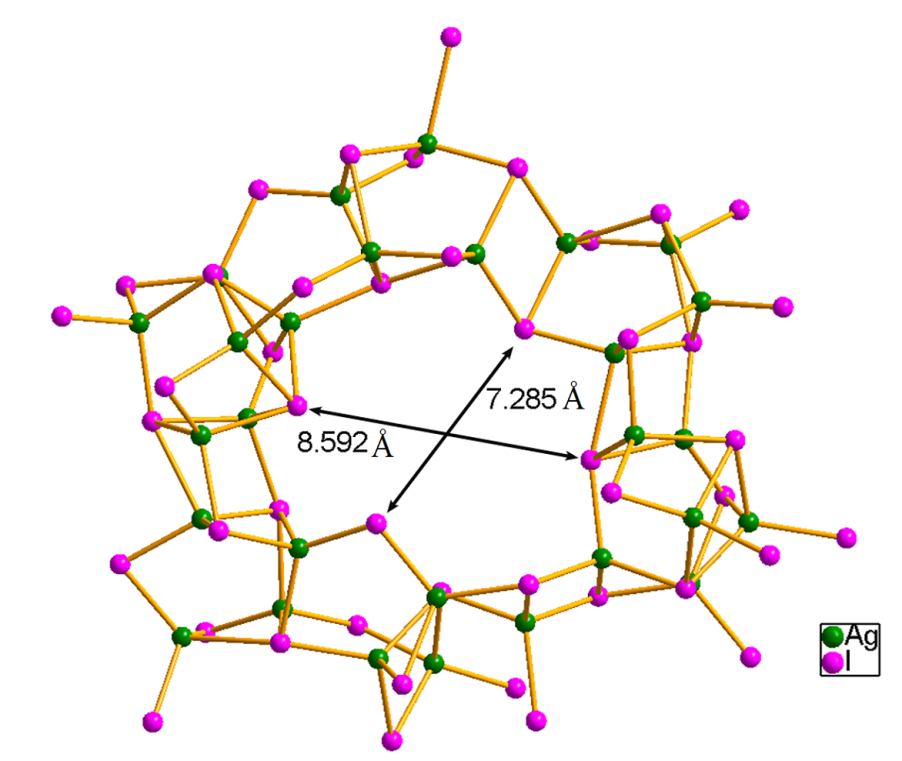


**Fig. S3.** The Ag7I7 circle in the [Ag10I13]n3n– layer showing sectional dimension in **1**.
